# Supplementary material
Source: PubMed Central journal article supplement (PMC9974372)
Supplement: sj-pdf-1-edr-10.3102_0013189X231153659.pdf [file sj-pdf-1-edr-10.3102_0013189X231153659.pdf]

## **Online Appendix**

### **Two Years Later: How COVID-19 has Shaped the Teacher Workforce**

Andrew Bacher-Hicks  
(Boston University)

Olivia L. Chi  
(Boston University)

Alexis Orellana  
(Boston University)

Online Appendix Figure A1: Turnover by Experience and Race/Ethnicity

Panel A: White teachers

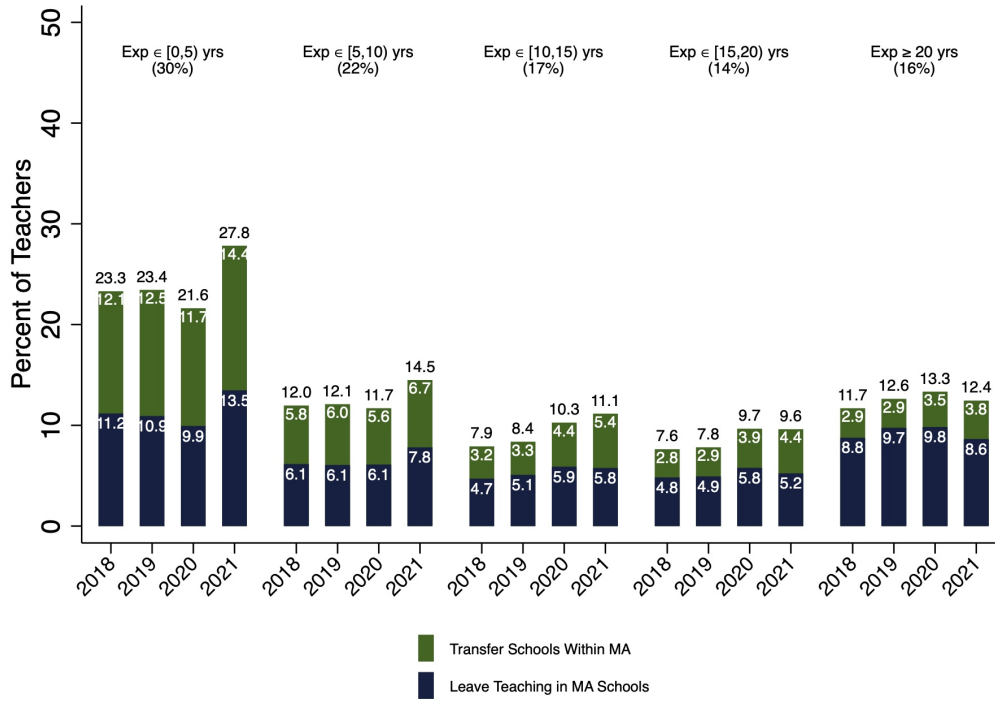

Panel B: Black teachers

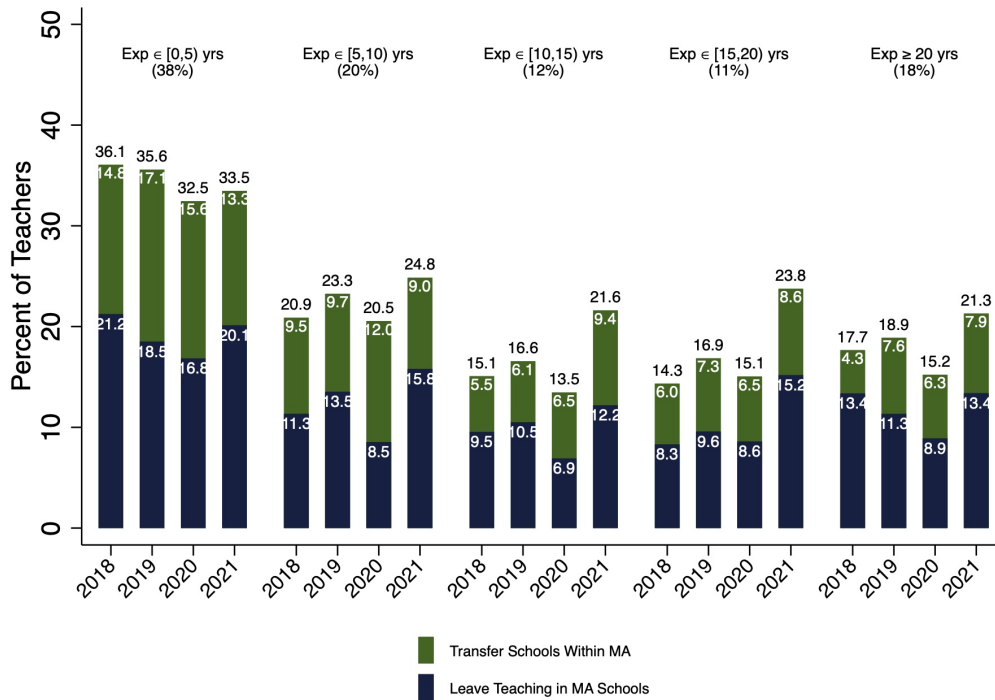

Panel C: Hispanic/Latinx teachers

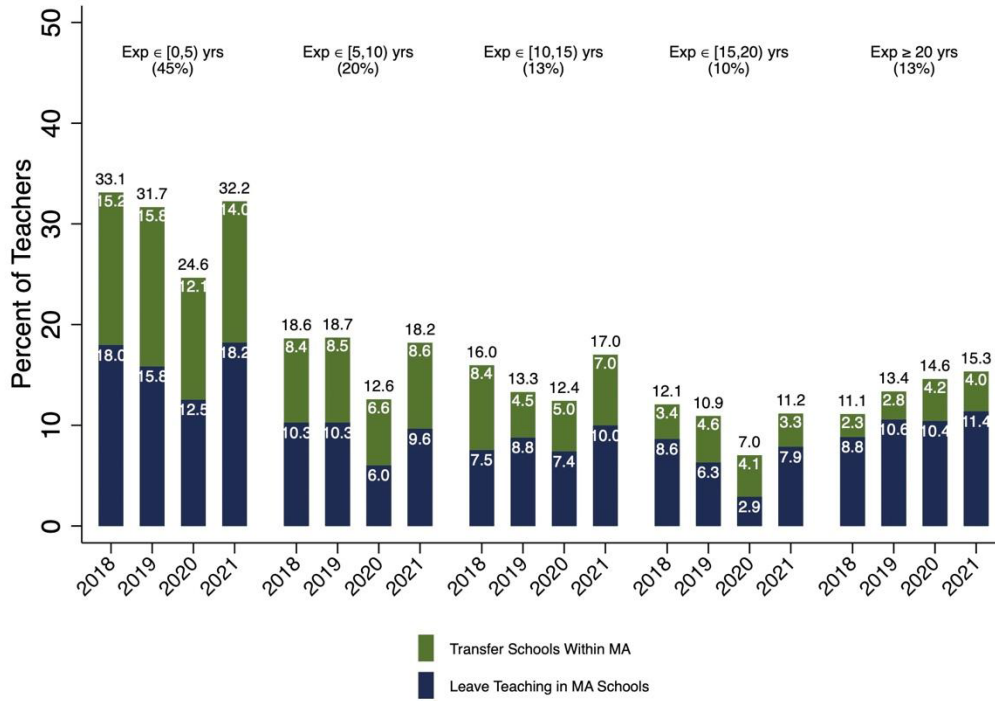

Panel D: Asian teachers

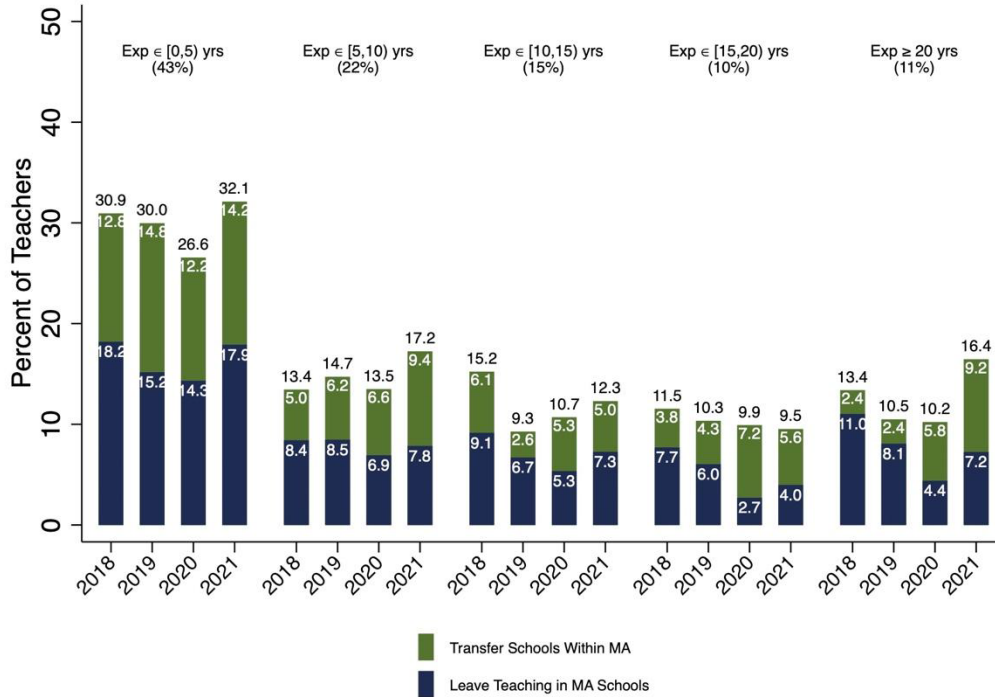

Online Appendix Figure A2: Turnover by Experience and Gender

Panel A: Female Teachers

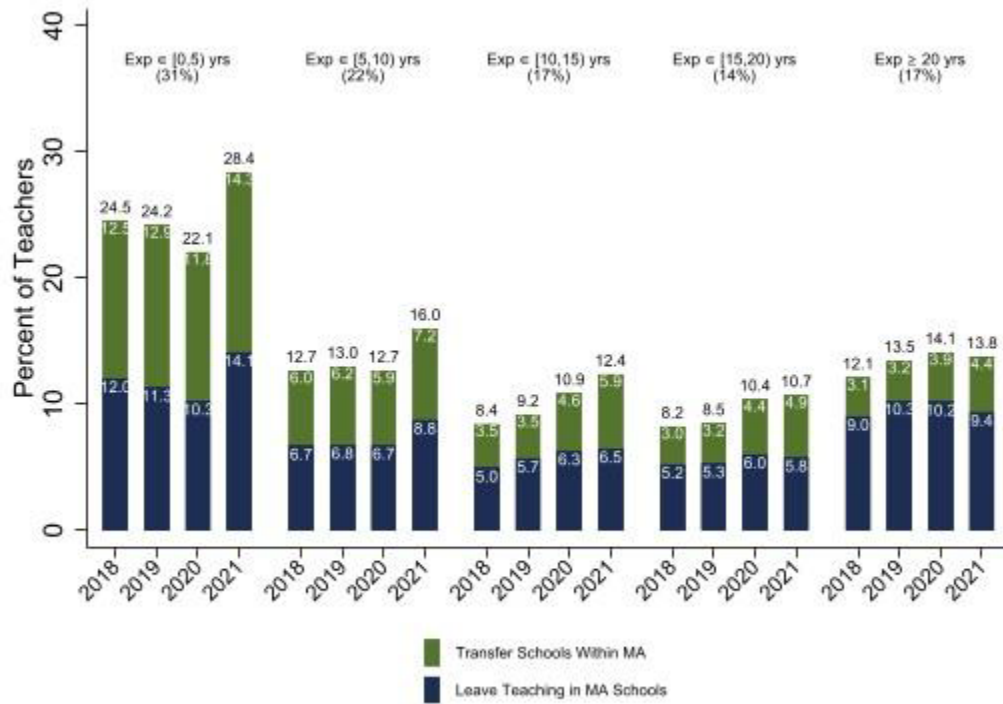

Panel B: Male Teachers

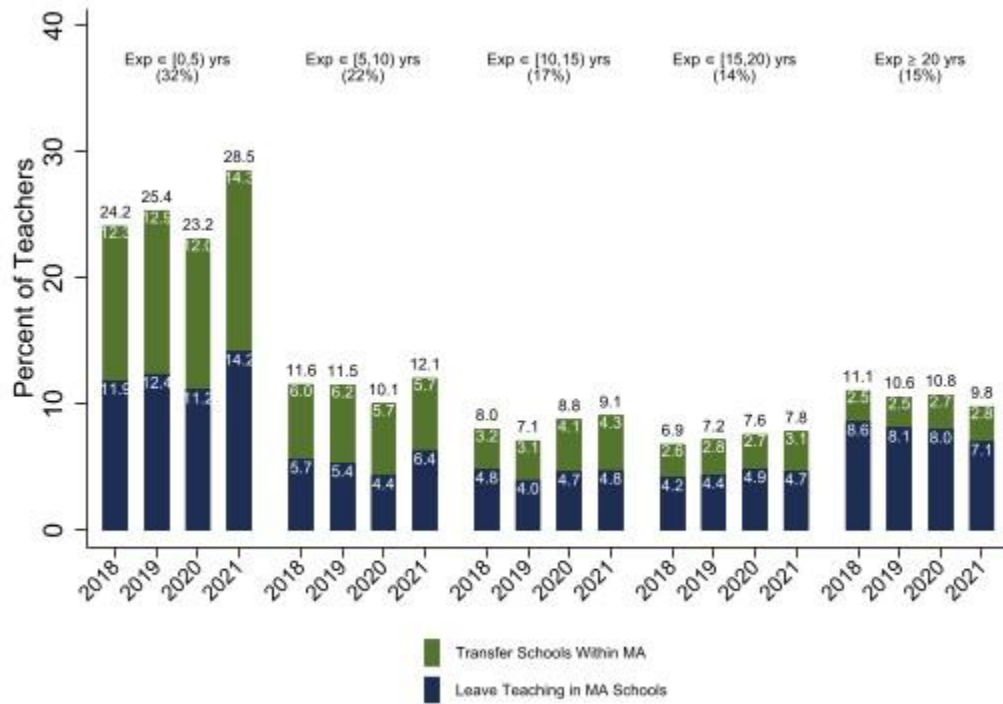

Online Appendix Figure A3: Turnover in Schools Serving Multiple Grade Levels

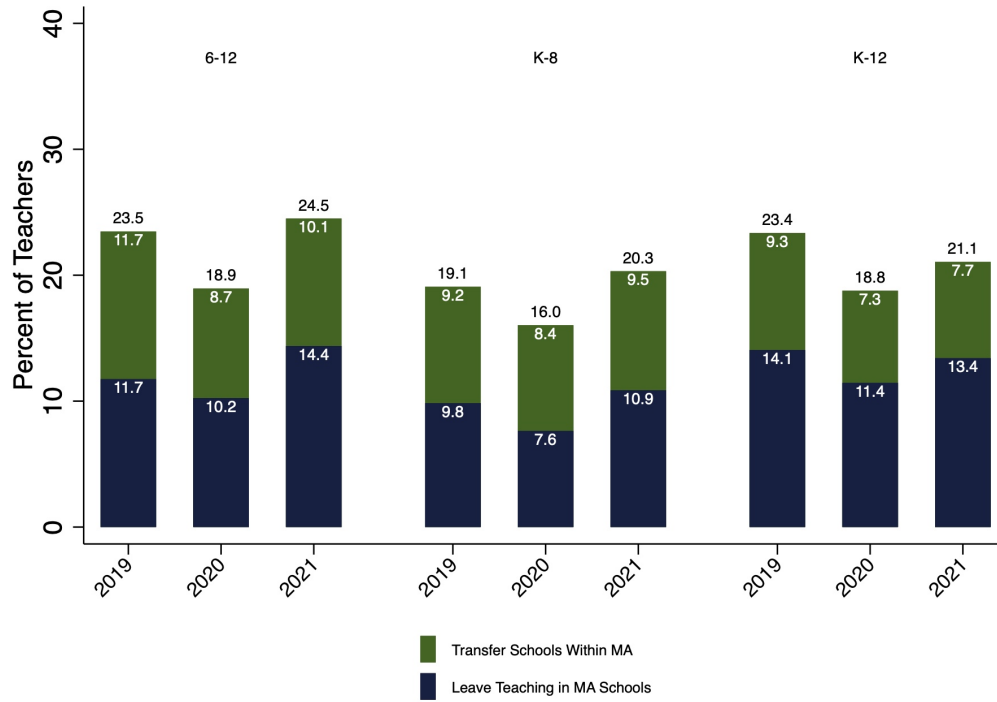

Online Appendix Table A1: Summary Statistics

---

|                                 |         |
|---------------------------------|---------|
| Mean Experience (Years)         | 10.7    |
| Std. Dev. of Experience (Years) | 8.2     |
| Newly Hired (%)                 | 9.9     |
| Female (%)                      | 76.3    |
| Black (%)                       | 2.9     |
| Asian (%)                       | 1.5     |
| Hispanic/Latinx (%)             | 3.2     |
| White (%)                       | 91.8    |
| Other Race/Ethnicity (%)        | 0.6     |
| Unique teachers                 | 116,760 |
| N (teacher-years)               | 550,877 |

---

Notes: Sample includes MADESE teachers from 2015-16 through 2021-22.

Online Appendix Table A2: Fall to Spring Turnover

|                              | Panel A: All Teachers         |         |         |         |         |         |
|------------------------------|-------------------------------|---------|---------|---------|---------|---------|
|                              | 2015-16                       | 2016-17 | 2017-18 | 2018-19 | 2019-20 | 2020-21 |
| Transfer Schools Within MA   | 1.71                          | 1.56    | 1.56    | 1.89    | 1.68    | 2.17    |
| Leave Teaching in MA Schools | 2.60                          | 3.23    | 2.71    | 2.06    | 1.92    | 2.35    |
| <b>Total</b>                 | 4.31                          | 4.80    | 4.28    | 3.94    | 3.60    | 4.52    |
| N (teachers)                 | 72,602                        | 77,244  | 78,507  | 79,226  | 80,402  | 81,438  |
|                              | Panel B: Newly Hired Teachers |         |         |         |         |         |
| Transfer Schools Within MA   | 6.25                          | 5.68    | 5.37    | 6.70    | 6.11    | 6.61    |
| Leave Teaching in MA Schools | 5.60                          | 7.22    | 5.63    | 5.23    | 5.69    | 4.16    |
| <b>Total</b>                 | 11.85                         | 12.90   | 11.00   | 11.94   | 11.80   | 10.77   |
| N (teachers)                 | 6,988                         | 7,605   | 8,754   | 7,700   | 7,482   | 7,838   |

Online Appendix Table A3: Characteristics of Transferring Teachers' Sending and Receiving Schools

|                                    | 2016-2019 |           | 2020    |           | 2021    |           |
|------------------------------------|-----------|-----------|---------|-----------|---------|-----------|
|                                    | Sending   | Receiving | Sending | Receiving | Sending | Receiving |
| Percent Economically Disadvantaged | 39.63     | 37.15     | 35.41   | 34.54     | 35.54   | 33.28     |
| Percent Black and Hispanic/Latinx  | 42.01     | 38.45     | 36.59   | 35.50     | 36.11   | 33.08     |
| Average Std. Math Test Scores      | -0.16     | -0.12     | -0.07   | -0.06     | -0.08   | -0.04     |
| Average Std. ELA Test Scores       | -0.16     | -0.12     | -0.08   | -0.06     | -0.08   | -0.04     |
| N (teacher-years)                  | 20,845    |           | 5,483   |           | 6,607   |           |

Notes: School characteristics are based on schools' 2018-19 characteristics. Transfers are measured between the spring semester and fall semester of each calendar year (e.g., transfers in 2021 are measured from spring 2021 to fall 2021).



Online Appendix Table A4: Characteristics of Newly Hired Teachers

|                      | 2015-16 to<br>2018-19 | 2019-20 | 2020-21 |
|----------------------|-----------------------|---------|---------|
| <i>Demographics</i>  |                       |         |         |
| Female               | 77.4                  | 77.8    | 76.6    |
| Black                | 5.5                   | 6.0     | 6.8     |
| Asian                | 2.4                   | 2.1     | 2.6     |
| Hispanic/Latinx      | 5.0                   | 6.2     | 6.6     |
| White                | 86.1                  | 84.7    | 82.8    |
| Other                | 1.0                   | 1.0     | 1.1     |
| <i>Licenses</i>      |                       |         |         |
| Initial License      | 39.7                  | 39.6    | 37.2    |
| Provisional License  | 18.0                  | 16.7    | 12.0    |
| Professional License | 20.7                  | 17.6    | 15.4    |
| Emergency License    | 0.0                   | 0.0     | 15.5    |
| Other License        | 21.6                  | 23.4    | 19.9    |
| N (teacher-years)    | 34,714                | 7,929   | 8,898   |

Online Appendix Table A5: School Characteristics of Newly Hired Teachers

|                                    | <u>2015-16 to<br/>2018-19</u> | <u>2019-20</u> | <u>2020-21</u> |
|------------------------------------|-------------------------------|----------------|----------------|
| Percent Economically Disadvantaged | 36.51                         | 36.63          | 34.40          |
| Percent Black and Hispanic/Latinx  | 39.35                         | 39.35          | 36.80          |
| Average Std. Math Test Scores      | -0.09                         | -0.10          | -0.06          |
| Average Std. ELA Test Scores       | -0.09                         | -0.09          | -0.06          |
| N (teacher-years)                  | 34,127                        | 7,813          | 8,562          |

Notes: School characteristics are based on schools' 2018-19 characteristics.
